# Supplementary material for: Behavior Coding of Adolescent and Therapy Dog Interactions During a Social Stress Task
Source: Preprints.org preprint supplement (doi:10.20944/preprints202410.2487.v1), 2024-10-31
Supplement: Supplementary file 1 [file supplementary]

## Sheet: S1. All Participants
Table S1. Correlations Between Participant and Therapy Dog Behaviors, Total Sample (N = 75)
Correlations
			Bite Lip (d)	Bite Nails (d)	Close Eyes (d)	Cross Arms (d)	Cry (d)	General Fidget (d)	General Scratch (d)	Grimace/Facial Tension (d)	Head Toward Dog (d)	Internal Tongue Movement (d)	Laugh (c)	Lean Towards Dog (d)	Play with Hair (d)	Reposition (c)	Sit on Hands (d)	Smile (c)	Stretch (c)	Talk to Dog (d)	Talk to Experimenter (d)	Talk to Handler (d)	Talk to Self (d)	Touch Dog (d)	Touch Face (c)	Human Yawn (c)	Bark (c)	Circle (d)	Ears Down (d)	Ears Twitch (c)	Groom (d)	Head toward Participant (d)	Jerk/Twitch (c)	Lay Alert (d)	Lay Down (d)	Lick Object (d)	Lift Paw (d)	Near Participant (d)	Pant (d)	Paw at Person (c)	Paws on Participant (d)	Scratch at Object/Floor (d)	Shake Head (c)	Shake Off (d)	Shift Head (c)	Shift Position (c)	Sit (d)	Sniff Object/Floor (d)	Sniff Participant (d)
Spearman's rho	Bite Lip (d)	Correlation Coefficient	--
		Sig. (2-tailed)
		N	75
	Bite Nails (d)	Correlation Coefficient	-0.166218	--
		Sig. (2-tailed)	0.154086
		N	75	75
	Close Eyes (d)	Correlation Coefficient	-0.161392	0.0948369	--
		Sig. (2-tailed)	0.16657	0.418318
		N	75	75	75
	Cross Arms (d)	Correlation Coefficient	0.0723037	-0.00421214	-0.0506112	--
		Sig. (2-tailed)	0.537592	0.971389	0.666308
		N	75	75	75	75
	Cry (d)	Correlation Coefficient	-0.0683311	.251*	0.158209	-0.0646982	--
		Sig. (2-tailed)	0.560225	0.0297238	0.175204	0.581311
		N	75	75	75	75	75
	General Fidget (d)	Correlation Coefficient	-0.0691182	.286*	-0.0277839	0.0532566	-0.0621804	--
		Sig. (2-tailed)	0.555705	0.0127439	0.812951	0.649979	0.596135
		N	75	75	75	75	75	75
	General Scratch (d)	Correlation Coefficient	.285*	-0.0803209	-0.114736	0.0514206	-0.0314466	0.0187809	--
		Sig. (2-tailed)	0.0132144	0.493329	0.326991	0.661295	0.788832	0.872936
		N	75	75	75	75	75	75	75
	Grimace/Facial Tension (d)	Correlation Coefficient	0.181135	-0.0210762	0.195354	-.247*	0.117262	-0.023176	0.180934	--
		Sig. (2-tailed)	0.119894	0.857561	0.0930297	0.0329969	0.316381	0.843541	0.120312
		N	75	75	75	75	75	75	75	75
	Head Toward Dog (d)	Correlation Coefficient	0.122795	0.0479331	0.0156977	0.0833037	-0.118449	.322**	0.199931	.306**	--
		Sig. (2-tailed)	0.293925	0.682998	0.893663	0.477363	0.311474	0.00477967	0.0854726	0.00758895
		N	75	75	75	75	75	75	75	75	75
	Internal Tongue Movement (d)	Correlation Coefficient	.264*	0.105642	-0.0567248	-0.060577	0.188584	0.137644	.399**	.387**	.320**	--
		Sig. (2-tailed)	0.021944	0.367031	0.628819	0.605662	0.105162	0.238947	0.000395599	0.000614251	0.00512453
		N	75	75	75	75	75	75	75	75	75	75
	Laugh (c)	Correlation Coefficient	0.175998	0.169382	0.0487252	-0.0201472	0.0238308	0.121476	0.00571174	.272*	.558**	0.156819	--
		Sig. (2-tailed)	0.13094	0.146286	0.678045	0.863778	0.839179	0.299179	0.96121	0.0182852	1.98952e-07	0.179074
		N	75	75	75	75	75	75	75	75	75	75	75
	Lean Towards Dog (d)	Correlation Coefficient	0.0172074	-0.0473061	0.103101	-0.0703786	-0.167849	0.144614	0.16924	.349**	.759**	0.201667	.480**	--
		Sig. (2-tailed)	0.883504	0.686928	0.378733	0.548504	0.150027	0.215761	0.146631	0.00213145	3.03276e-15	0.0827358	1.33884e-05
		N	75	75	75	75	75	75	75	75	75	75	75	75
	Play with Hair (d)	Correlation Coefficient	-0.0856277	.495**	-0.0681518	0.114092	0.0395742	.235*	-0.0897994	-0.0309818	.247*	0.0260618	.320**	0.0909209	--
		Sig. (2-tailed)	0.465118	6.21718e-06	0.561257	0.329729	0.736043	0.0421577	0.443573	0.791882	0.0326136	0.824354	0.00511458	0.437878
		N	75	75	75	75	75	75	75	75	75	75	75	75	75
	Reposition (c)	Correlation Coefficient	-0.0218605	.283*	-0.119704	-0.157173	-0.211655	0.195699	0.148386	0.151259	.363**	0.214541	0.176308	.328**	.305**	--
		Sig. (2-tailed)	0.852319	0.0139908	0.306336	0.178081	0.068317	0.0924429	0.203897	0.195179	0.00135071	0.0645507	0.130252	0.00401065	0.00779174
		N	75	75	75	75	75	75	75	75	75	75	75	75	75	75
	Sit on Hands (d)	Correlation Coefficient	0.183716	-0.102942	-0.115144	-0.115144	-0.0487502	0.0252166	0.0813395	0.219483	.241*	.272*	0.196739	0.220833	0.0438677	.263*	--
		Sig. (2-tailed)	0.11462	0.379474	0.325262	0.325262	0.67789	0.829963	0.487845	0.0584923	0.0372799	0.0180762	0.0906898	0.0569197	0.708624	0.0228332
		N	75	75	75	75	75	75	75	75	75	75	75	75	75	75	75
	Smile (c)	Correlation Coefficient	0.206228	0.162939	0.0696076	-0.0428688	0.0602279	0.122125	0.150647	.423**	.450**	.254*	.591**	.363**	0.16111	.236*	0.174771	--
		Sig. (2-tailed)	0.0758772	0.162491	0.552903	0.714972	0.607745	0.296585	0.197014	0.000156581	5.044e-05	0.0281818	2.35327e-08	0.00138363	0.167322	0.0412766	0.133691
		N	75	75	75	75	75	75	75	75	75	75	75	75	75	75	75	75
	Stretch (c)	Correlation Coefficient	0.0635947	.313**	0.104832	0.0376638	0.138608	0.0652448	0.154896	0.0459525	0.134811	0.182437	0.03257	0.0764946	0.191048	0.15166	0.0270551	0.0214899	--
		Sig. (2-tailed)	0.587787	0.00630421	0.370739	0.748352	0.235639	0.578116	0.184532	0.69544	0.248845	0.117211	0.781473	0.514212	0.100611	0.193985	0.817773	0.854795
		N	75	75	75	75	75	75	75	75	75	75	75	75	75	75	75	75	75
	Talk to Dog (d)	Correlation Coefficient	0.0319459	-0.0117026	0.174993	-0.0211125	-0.135778	0.126286	0.223354	.338**	.620**	0.159259	.456**	.744**	0.0609212	.306**	-0.00926304	.514**	0.0315204	--
		Sig. (2-tailed)	0.785559	0.920623	0.133189	0.857319	0.245435	0.280306	0.0540762	0.0030572	2.99899e-09	0.172321	3.98176e-05	1.9343e-14	0.603611	0.00760785	0.937132	2.44037e-06	0.788348
		N	75	75	75	75	75	75	75	75	75	75	75	75	75	75	75	75	75	75
	Talk to Experimenter (d)	Correlation Coefficient	0.0330797	0.0448109	0.132419	0.0606721	0.159528	0.0544389	0.0325597	0.102456	-0.0388483	0.029873	-0.0186974	-0.0614506	.265*	-0.00819503	-0.0712354	0.156699	0.11344	0.0825487	--
		Sig. (2-tailed)	0.77814	0.702648	0.257417	0.605095	0.171586	0.642733	0.78154	0.381737	0.740712	0.799171	0.873497	0.600463	0.0215534	0.944369	0.543634	0.179412	0.33252	0.481378
		N	75	75	75	75	75	75	75	75	75	75	75	75	75	75	75	75	75	75	75
	Talk to Handler (d)	Correlation Coefficient	0.19335	0.0305848	0.000345204	-0.0690901	-0.187912	.241*	.239*	.432**	.790**	.275*	.610**	.750**	.229*	.394**	0.117484	.496**	0.147097	.731**	-0.00244748	--
		Sig. (2-tailed)	0.0965014	0.79449	0.997655	0.555866	0.106429	0.0372003	0.0386672	0.000109573	3.43173e-17	0.016769	6.45789e-09	9.29656e-15	0.0482854	0.000470525	0.31546	6.13232e-06	0.207899	1.01262e-13	0.983373
		N	75	75	75	75	75	75	75	75	75	75	75	75	75	75	75	75	75	75	75	75
	Talk to Self (d)	Correlation Coefficient	-0.0842542	0.0888234	0.11679	-0.0797748	-0.0337754	.290*	0	0.0864228	0.178353	-0.0874813	0.12195	0.180463	0.160767	0.166421	-0.0601104	.256*	0.135346	0.15142	0.0968224	.228*	--
		Sig. (2-tailed)	0.472334	0.448563	0.318345	0.496282	0.773597	0.0117601	1	0.460968	0.125784	0.455475	0.297282	0.121296	0.16824	0.153577	0.608447	0.0268274	0.246955	0.194698	0.408596	0.048954
		N	75	75	75	75	75	75	75	75	75	75	75	75	75	75	75	75	75	75	75	75	75
	Touch Dog (d)	Correlation Coefficient	0.0514152	0.00297888	-0.00907128	0.196081	-0.0390259	0.0760139	0.182153	0.149963	.641**	0.127379	.414**	.606**	0.108271	0.141182	0.0819491	.279*	0.127832	.541**	-0.0680322	.629**	0.0589831	--
		Sig. (2-tailed)	0.661329	0.979764	0.938431	0.0917958	0.739569	0.516867	0.11779	0.19908	5.92722e-10	0.276131	0.000225288	8.31252e-09	0.355158	0.226969	0.484579	0.0152594	0.274414	5.55866e-07	0.561947	1.56043e-09	0.615198
		N	75	75	75	75	75	75	75	75	75	75	75	75	75	75	75	75	75	75	75	75	75	75
	Touch Face (c)	Correlation Coefficient	-0.0549913	.541**	0.0992307	-0.0490373	0.14837	.280*	0.0762719	0.139782	.335**	.228*	.300**	.248*	.515**	.534**	0.123952	0.183455	.419**	.231*	0.21075	.321**	0.0669541	0.0994701	--
		Sig. (2-tailed)	0.639359	5.26765e-07	0.396983	0.676098	0.203946	0.0148588	0.515441	0.231658	0.00328024	0.0489216	0.00886631	0.0316913	2.3125e-06	7.92233e-07	0.289364	0.115144	0.000183472	0.0461908	0.0695343	0.00493136	0.568175	0.395839
		N	75	75	75	75	75	75	75	75	75	75	75	75	75	75	75	75	75	75	75	75	75	75	75
	Human Yawn (c)	Correlation Coefficient	0.0532122	.303**	0.0833898	-0.0635176	-0.00721909	0.110164	0.225228	0.152118	.253*	.311**	.304**	0.154636	.282*	.350**	0.147951	0.100073	.390**	0.0903116	0.128413	.306**	-0.0892056	.257*	.542**	--
		Sig. (2-tailed)	0.650252	0.00832141	0.476906	0.588241	0.950985	0.346762	0.052039	0.192626	0.0283084	0.00668614	0.00792711	0.185278	0.0141223	0.00208717	0.205243	0.392966	0.000534429	0.440967	0.27222	0.00768583	0.446605	0.026241	5.14432e-07
		N	75	75	75	75	75	75	75	75	75	75	75	75	75	75	75	75	75	75	75	75	75	75	75	75
	Bark (c)	Correlation Coefficient	0.126985	0.151269	-0.0797797	.335**	-0.0337775	0.155822	0.0161797	0.0275421	0.156199	0.143213	0.139362	-0.107102	0.0620889	-0.0220008	0.17393	0.121303	0.167217	-0.047252	0.104873	0.12916	-0.0416487	-0.0546795	0.0387079	0.057937	--
		Sig. (2-tailed)	0.277633	0.19515	0.496255	0.00328351	0.773583	0.181888	0.890418	0.81455	0.18082	0.220288	0.233076	0.36041	0.596677	0.851382	0.1356	0.299873	0.15159	0.687267	0.37055	0.269417	0.722751	0.641263	0.741616	0.621492
		N	75	75	75	75	75	75	75	75	75	75	75	75	75	75	75	75	75	75	75	75	75	75	75	75	75
	Circle (d)	Correlation Coefficient	0.196506	-0.0185422	-0.161392	-0.161392	-0.0683311	-0.0164242	-0.0542581	.247*	0.0626341	0.0429051	0.0595514	0.106266	-0.0414376	0.0995341	.305**	-0.0214597	-0.0242197	0.0322794	-0.139473	0.157506	-0.0842542	-0.0820044	0.0420066	0.0417642	0.122014	--
		Sig. (2-tailed)	0.0910796	0.874538	0.16657	0.16657	0.560225	0.888772	0.643839	0.0330081	0.593452	0.714741	0.611791	0.364194	0.7241	0.395534	0.00770773	0.854998	0.836591	0.783374	0.232701	0.177152	0.472334	0.484283	0.720466	0.722014	0.297027
		N	75	75	75	75	75	75	75	75	75	75	75	75	75	75	75	75	75	75	75	75	75	75	75	75	75	75
	Ears Down (d)	Correlation Coefficient	-0.0479942	0.0512422	-0.0454425	-0.0454425	-0.0192397	0.0751767	0.173764	0.129931	-0.0214791	0.134247	-0.0269392	0.0898236	-0.0429835	0.0751901	-0.034241	0.088728	0.20529	0.178814	-0.0375883	0.120987	-0.0237231	0.032632	0.0698328	0.051982	-0.0237246	-0.0479942	--
		Sig. (2-tailed)	0.682616	0.662398	0.698657	0.698657	0.869859	0.521508	0.135978	0.266544	0.854868	0.250848	0.81854	0.44345	0.714242	0.521434	0.770561	0.449052	0.0772501	0.124793	0.748839	0.301145	0.839897	0.781067	0.551617	0.657827	0.839887	0.682616
		N	75	75	75	75	75	75	75	75	75	75	75	75	75	75	75	75	75	75	75	75	75	75	75	75	75	75	75
	Ears Twitch (c)	Correlation Coefficient	.244*	-0.0847711	-0.0402732	0.0884219	-0.158331	0.117092	.245*	.268*	.551**	.347**	0.193302	.381**	-0.0444882	0.108923	.269*	0.141905	-0.0388147	.350**	-0.120129	.469**	-0.195227	.458**	0.112549	0.100751	0.0773614	0.141463	0.188198	--
		Sig. (2-tailed)	0.0351479	0.469611	0.731556	0.450625	0.174866	0.317087	0.0343564	0.0202965	2.9366e-07	0.00230458	0.0965855	0.000738493	0.704691	0.352252	0.0194606	0.224575	0.740929	0.00206976	0.304611	2.20994e-05	0.0932474	3.60125e-05	0.336358	0.389754	0.509443	0.226039	0.105888
		N	75	75	75	75	75	75	75	75	75	75	75	75	75	75	75	75	75	75	75	75	75	75	75	75	75	75	75	75
	Groom (d)	Correlation Coefficient	0.201977	0.0147552	0.0804462	0.0292096	-0.104536	0.220428	.237*	0.210077	.362**	0.166995	.242*	.347**	0.0458773	0.134516	-0.0570532	.413**	-0.144775	.332**	-0.0958381	.356**	.288*	0.142969	0.00532434	-0.0964877	-0.128904	0.0769233	0.173547	0.226463	--
		Sig. (2-tailed)	0.0822539	0.900014	0.492653	0.803541	0.372098	0.0573883	0.040429	0.0704497	0.00140672	0.152142	0.0363037	0.00228374	0.695914	0.249892	0.62683	0.000233742	0.215246	0.00360057	0.413399	0.0017272	0.0122254	0.221084	0.963839	0.410225	0.270377	0.511851	0.136477	0.0507309
		N	75	75	75	75	75	75	75	75	75	75	75	75	75	75	75	75	75	75	75	75	75	75	75	75	75	75	75	75	75
	Head toward Participant (d)	Correlation Coefficient	0.216446	-0.0777801	0.0104767	0.0461121	-0.191327	0.18054	0.146122	.284*	.666**	0.181343	.326**	.581**	0.0466845	0.181066	0.14973	.295*	-0.0312809	.562**	0.0134551	.637**	0.106476	.556**	0.151397	3.7016e-05	0.0557235	0.191842	0.170036	.673**	.349**	--
		Sig. (2-tailed)	0.0621572	0.507146	0.928916	0.694435	0.100106	0.121136	0.210961	0.0136969	7.23011e-11	0.119462	0.00425292	4.62648e-08	0.690832	0.120037	0.199786	0.0101229	0.789919	1.57007e-07	0.908784	8.01336e-10	0.36324	2.25264e-07	0.194768	0.999749	0.634898	0.0991788	0.144711	3.70443e-11	0.0021695
		N	75	75	75	75	75	75	75	75	75	75	75	75	75	75	75	75	75	75	75	75	75	75	75	75	75	75	75	75	75	75
	Jerk/Twitch (c)	Correlation Coefficient	0.220932	0.0649802	-0.0738693	0.176492	-0.095107	0.155521	0.0541298	0.141866	.320**	0.0863776	0.157091	0.184367	0.0985604	.317**	0.197097	0.0935508	-0.0244534	.232*	-0.170963	.292*	0.205791	0.150112	0.162408	-0.0707627	0.0411772	0.0113213	-0.0668009	.272*	.316**	.318**	--
		Sig. (2-tailed)	0.0568058	0.579662	0.528797	0.129846	0.416987	0.182744	0.644624	0.224705	0.00511917	0.461204	0.178311	0.113319	0.400195	0.00563449	0.0900929	0.424686	0.835036	0.0450051	0.142502	0.0110185	0.0765139	0.198629	0.163882	0.546318	0.725765	0.923201	0.569062	0.0183264	0.00576759	0.00545411
		N	75	75	75	75	75	75	75	75	75	75	75	75	75	75	75	75	75	75	75	75	75	75	75	75	75	75	75	75	75	75	75
	Lay Alert (d)	Correlation Coefficient	.246*	-0.060264	0.0131993	0.101963	-0.194762	.256*	0.177371	.285*	.625**	.227*	.285*	.560**	-0.0494876	0.146952	0.157258	.462**	0.00759362	.523**	-0.0456026	.540**	0.118131	.356**	0.0656741	-0.111845	0.155668	.233*	0.114909	.604**	.614**	.715**	.334**	--
		Sig. (2-tailed)	0.0337015	0.607529	0.910511	0.384044	0.0940444	0.0265144	0.127916	0.013285	2.10695e-09	0.0499867	0.013309	1.71496e-07	0.673291	0.208353	0.177846	3.03198e-05	0.948445	1.52116e-06	0.697647	5.85746e-07	0.312781	0.00172738	0.575611	0.339407	0.182326	0.0446766	0.326255	9.57228e-09	4.69478e-09	5.87968e-13	0.00343647
		N	75	75	75	75	75	75	75	75	75	75	75	75	75	75	75	75	75	75	75	75	75	75	75	75	75	75	75	75	75	75	75	75
	Lay Down (d)	Correlation Coefficient	0.15334	0.0546356	-0.0929091	-0.0362464	-0.187912	0.0832581	0.117197	.274*	.645**	0.206584	.429**	.610**	0.139749	.256*	0.197189	0.167922	0.0390472	.429**	-.309**	.756**	0.170987	.629**	0.126631	0.185772	0.0819158	0.186744	-0.0219976	.499**	0.195217	.591**	.387**	.374**	--
		Sig. (2-tailed)	0.189035	0.641531	0.427883	0.757525	0.106429	0.477605	0.31665	0.0171771	4.24099e-10	0.0753623	0.0001238	6.43812e-09	0.231769	0.0268219	0.089939	0.149848	0.739432	0.000124104	0.00699161	4.35731e-15	0.142445	1.54978e-09	0.278984	0.110548	0.484757	0.108662	0.851404	5.16188e-06	0.0932649	2.35879e-08	0.000605421	0.000964513
		N	75	75	75	75	75	75	75	75	75	75	75	75	75	75	75	75	75	75	75	75	75	75	75	75	75	75	75	75	75	75	75	75	75
	Lick Object (d)	Correlation Coefficient	0.21958	0.157797	-0.104396	0.200941	-0.0441997	0.0294421	-0.00858706	.256*	0.196686	0.0575037	.269*	0.0145479	.311**	0.0170103	0.120196	0.21591	-0.00586333	0.176987	0.0435545	0.165891	-0.0544995	0.163809	0.0642864	0.17664	0.224891	0.195952	-0.0310448	0.217661	0.118749	.244*	0.20171	0.148501	0.128259	--
		Sig. (2-tailed)	0.0583775	0.176345	0.372742	0.083871	0.706519	0.802009	0.941712	0.0264651	0.0907783	0.624107	0.0194005	0.901411	0.00654782	0.884829	0.304338	0.0628231	0.960182	0.128755	0.710612	0.154909	0.642363	0.160227	0.583724	0.129519	0.0524006	0.0920146	0.791468	0.0606696	0.31024	0.0348246	0.0826694	0.203544	0.272801
		N	75	75	75	75	75	75	75	75	75	75	75	75	75	75	75	75	75	75	75	75	75	75	75	75	75	75	75	75	75	75	75	75	75	75
	Lift Paw (d)	Correlation Coefficient	0.197818	-0.160061	0.191035	0.183945	-0.0646982	0.0493562	0.0312679	0.142195	.291*	0.0404971	0.0790184	0.173278	0.0789203	0.0427188	0.183309	.294*	-0.139759	.231*	0.0774291	0.10652	-0.0797748	0.0663276	0.0788788	-0.0984535	0.137647	0.0747686	-0.0454425	.330**	.424**	.370**	0.154706	.505**	-0.0473422	.377**	--
		Sig. (2-tailed)	0.0888987	0.170141	0.100635	0.114161	0.581311	0.674109	0.790004	0.22362	0.0112047	0.73012	0.500387	0.137094	0.500921	0.715927	0.115439	0.0105458	0.231736	0.0458371	0.509071	0.36304	0.496282	0.571809	0.501147	0.400709	0.238937	0.523778	0.698657	0.00385223	0.000151153	0.00109757	0.185076	3.8374e-06	0.686701	0.000846422
		N	75	75	75	75	75	75	75	75	75	75	75	75	75	75	75	75	75	75	75	75	75	75	75	75	75	75	75	75	75	75	75	75	75	75	75
	Near Participant (d)	Correlation Coefficient	0.0434309	-0.0743517	-0.0727457	0.0480963	-0.145254	0.109219	-0.0249047	-0.0148543	.274*	-0.0192589	-0.0363843	.452**	-0.0518139	0.146797	0.110265	-0.0120403	0.00392556	.295*	-0.148462	.237*	0.0203097	0.164382	0.107128	-.250*	-0.0944128	.273*	0.215706	.426**	.232*	.609**	.245*	.584**	.340**	-0.0674478	.250*	--
		Sig. (2-tailed)	0.711397	0.526102	0.535102	0.681976	0.213714	0.350937	0.832036	0.899345	0.0172632	0.86973	0.756631	4.74135e-05	0.658864	0.208837	0.346317	0.918341	0.973335	0.0102842	0.203664	0.040592	0.86269	0.158749	0.360294	0.0304987	0.420411	0.0178513	0.0630781	0.000141372	0.0449544	6.57039e-09	0.0343216	3.70493e-08	0.00288093	0.565318	0.0305842
		N	75	75	75	75	75	75	75	75	75	75	75	75	75	75	75	75	75	75	75	75	75	75	75	75	75	75	75	75	75	75	75	75	75	75	75	75
	Pant (d)	Correlation Coefficient	-0.0110386	-0.145631	0.0254744	-0.125225	-0.0530186	0.0605002	0.0582817	0.0283883	0.00683499	0.0635315	-0.123812	0.017592	-.324**	-.316**	-0.0943575	-0.0656958	-0.0762294	0.0419858	-0.121776	-0.0371216	-0.0653735	0.0339283	-0.226244	-0.206131	-0.0653775	-0.00352685	.372**	.354**	0.0933358	.330**	-0.105135	.306**	-0.0150103	-0.0855499	0.010018	.287*	--
		Sig. (2-tailed)	0.925114	0.212517	0.828251	0.284399	0.651441	0.60612	0.619415	0.808959	0.95359	0.588159	0.289914	0.880919	0.00457218	0.00572479	0.420685	0.575485	0.515676	0.720599	0.297981	0.751857	0.577365	0.7726	0.0509604	0.0760186	0.577341	0.976043	0.00100182	0.00184115	0.425755	0.00379064	0.36935	0.00764149	0.898294	0.465525	0.93202	0.0126792
		N	75	75	75	75	75	75	75	75	75	75	75	75	75	75	75	75	75	75	75	75	75	75	75	75	75	75	75	75	75	75	75	75	75	75	75	75	75
	Paw at Person (c)	Correlation Coefficient	0.0360902	-0.204884	0.126654	0.0333617	-0.0719025	0.0802938	-0.0735737	-0.0650136	.242*	0.117667	-0.103619	0.0945056	-0.131188	-0.198863	0.00853102	-0.0592404	-0.141012	0.0198498	-0.053715	-0.0434796	-0.0886579	0.00960939	-0.101101	-0.168365	0.103112	0.118344	-0.0505027	.405**	0.0556004	.423**	-0.111159	.401**	0.0403739	0.046924	.388**	.355**	.594**	--
		Sig. (2-tailed)	0.758539	0.0778494	0.278898	0.776297	0.539857	0.493475	0.530452	0.579466	0.0368001	0.314699	0.376329	0.419953	0.261908	0.08719	0.942092	0.613655	0.227537	0.86577	0.647166	0.711088	0.449412	0.934787	0.388097	0.148761	0.378681	0.311905	0.666981	0.000309916	0.635648	0.000158682	0.342394	0.0003596	0.73091	0.689327	0.000592167	0.00179108	1.99724e-08
		N	75	75	75	75	75	75	75	75	75	75	75	75	75	75	75	75	75	75	75	75	75	75	75	75	75	75	75	75	75	75	75	75	75	75	75	75	75	75
	Paws on Participant (d)	Correlation Coefficient	-0.110258	-0.201432	0.0670918	-0.104396	-0.0441997	-0.0793291	-0.0556385	-0.151104	0.100679	-0.0847094	-0.047563	0.172752	-0.0724472	-0.0573153	-0.0786624	0.0336845	-0.2268	0.112356	-0.0643613	-0.0216628	-0.0544995	0.0284538	-0.17629	-0.210278	-0.0545029	0.183068	-0.0310448	-0.0488776	0.152116	.311**	-0.153463	.256*	0.00404283	-0.0713199	.229*	.340**	0.102399	.453**	--
		Sig. (2-tailed)	0.346347	0.0831028	0.567377	0.372742	0.706519	0.498699	0.635416	0.195643	0.390095	0.469936	0.685317	0.138309	0.536782	0.625245	0.502325	0.77419	0.0503783	0.33719	0.583285	0.85364	0.642363	0.808526	0.130293	0.0701749	0.642342	0.115926	0.791468	0.677094	0.19263	0.00661333	0.188675	0.0268556	0.972539	0.543155	0.0479578	0.00282449	0.382004	4.49101e-05
		N	75	75	75	75	75	75	75	75	75	75	75	75	75	75	75	75	75	75	75	75	75	75	75	75	75	75	75	75	75	75	75	75	75	75	75	75	75	75	75
	Scratch at Object/Floor (d)	Correlation Coefficient	.418**	-0.0287944	-0.0166013	-0.000143115	-0.0530186	-0.0101468	0.059133	0.175587	0.0236195	0.141325	0.0569426	0.115984	-0.13702	0.025738	0.0760252	0.182255	-0.0393452	0.150173	0.0388678	0.0367463	-0.0653735	-0.14432	-0.0481869	-0.0627985	0.174008	.290*	-0.037239	0.0812873	0.186707	-0.0183252	0.00937484	.381**	-0.0292123	0.117847	.273*	0.13957	0.0579694	0.225764	-0.0855499	--
		Sig. (2-tailed)	0.000192858	0.806279	0.88758	0.999028	0.651441	0.931148	0.614299	0.131857	0.840587	0.226495	0.6275	0.321722	0.241101	0.826502	0.516805	0.117583	0.737515	0.198444	0.740586	0.754286	0.577365	0.216705	0.68141	0.59248	0.135422	0.0116849	0.751097	0.488125	0.108734	0.875995	0.936375	0.000734609	0.803523	0.313955	0.0176697	0.232374	0.621297	0.0514676	0.465525
		N	75	75	75	75	75	75	75	75	75	75	75	75	75	75	75	75	75	75	75	75	75	75	75	75	75	75	75	75	75	75	75	75	75	75	75	75	75	75	75	75
	Shake Head (c)	Correlation Coefficient	0.04846	0.03751	-0.0813418	-0.097907	-0.0821888	0.110962	0.128224	.234*	.264*	-0.0504867	0.178757	.367**	-0.0187699	0.0940554	-0.00758447	0.0950412	0.00896451	.303**	-.260*	.294*	0.0517966	.348**	0.106883	0.0515487	-0.101347	-0.0405407	-0.0577275	.240*	0.0665833	0.209381	.239*	0.194978	.399**	0.149193	0.0793402	.246*	0.0687424	-0.0318974	-0.132618	0.0497135	--
		Sig. (2-tailed)	0.679702	0.749346	0.487833	0.403341	0.483298	0.343255	0.272932	0.0434882	0.0223288	0.66708	0.124914	0.00120834	0.87301	0.42218	0.948508	0.417311	0.939155	0.00813938	0.024558	0.0104381	0.658971	0.00220069	0.361397	0.660503	0.386938	0.72984	0.622756	0.038401	0.570325	0.0714069	0.039043	0.093674	0.000392565	0.201422	0.498638	0.0333337	0.557861	0.785876	0.256695	0.671885
		N	75	75	75	75	75	75	75	75	75	75	75	75	75	75	75	75	75	75	75	75	75	75	75	75	75	75	75	75	75	75	75	75	75	75	75	75	75	75	75	75	75
	Shake Off (d)	Correlation Coefficient	0.101262	-0.0471528	0.0153231	0.152034	-0.104536	0.0795527	0.132826	0.110601	.349**	0.0578931	0.0425449	.255*	0.0927454	0.196149	0.0301428	0.132064	0.0919916	.250*	-0.0615521	0.212601	0.0117178	0.197431	0.0369874	-0.00180183	0.0497907	.251*	-0.0734236	.425**	0.218876	.350**	0.115844	.532**	0.225061	0.225149	.315**	.310**	-0.020426	.391**	0.22523	.330**	0.127971	--
		Sig. (2-tailed)	0.387342	0.68789	0.896186	0.192875	0.372098	0.497486	0.255946	0.34484	0.00212355	0.621757	0.717034	0.0272028	0.428701	0.0916806	0.797397	0.258708	0.432479	0.0308705	0.59986	0.0670626	0.92052	0.0895378	0.752725	0.987759	0.671405	0.0295965	0.531293	0.000145289	0.0592096	0.00206127	0.322309	9.08477e-07	0.0522183	0.0521239	0.00583942	0.00686242	0.861912	0.000524937	0.0520363	0.00385539	0.273889
		N	75	75	75	75	75	75	75	75	75	75	75	75	75	75	75	75	75	75	75	75	75	75	75	75	75	75	75	75	75	75	75	75	75	75	75	75	75	75	75	75	75	75
	Shift Head (c)	Correlation Coefficient
		Sig. (2-tailed)
		N	75	75	75	75	75	75	75	75	75	75	75	75	75	75	75	75	75	75	75	75	75	75	75	75	75	75	75	75	75	75	75	75	75	75	75	75	75	75	75	75	75	75	75
	Shift Position (c)	Correlation Coefficient	0.203714	-0.118607	-0.0172731	0.152612	-0.194775	0.218946	.257*	.287*	.660**	.259*	0.192251	.552**	0.0042427	0.159141	0.175725	.262*	-0.0371318	.473**	-0.156278	.532**	0.0532416	.419**	0.0828993	-0.0792138	0.0499144	0.160957	0.158695	.756**	.596**	.742**	.432**	.871**	.505**	0.157512	.530**	.615**	.326**	.441**	0.142711	.227*	.318**	.531**		--
		Sig. (2-tailed)	0.079599	0.310822	0.883063	0.191169	0.0940221	0.0591266	0.0263059	0.01243	1.20961e-10	0.02459	0.0984462	2.8683e-07	0.971182	0.172643	0.131549	0.0233602	0.751791	1.81152e-05	0.180596	8.98757e-07	0.650071	0.000181212	0.479511	0.499325	0.670635	0.167731	0.173865	4.39861e-15	1.74038e-08	2.51397e-14	0.000107752	3.5181e-24	3.86186e-06	0.177137	9.94915e-07	4.2226e-09	0.0043599	7.44111e-05	0.221927	0.0498276	0.00550512	9.55345e-07
		N	75	75	75	75	75	75	75	75	75	75	75	75	75	75	75	75	75	75	75	75	75	75	75	75	75	75	75	75	75	75	75	75	75	75	75	75	75	75	75	75	75	75	75	75
	Sit (d)	Correlation Coefficient	0.222686	-0.0863882	0.044654	0.11989	-0.161313	.232*	0.130798	0.165103	.513**	.231*	0.167835	.506**	-0.11989	0.0845815	0.215636	0.212493	-0.0363473	.371**	-0.100489	.348**	-0.0401342	.240*	0.060457	-0.0658648	0.0861967	.245*	0.209609	.661**	.453**	.723**	0.159378	.805**	.252*	0.172972	.497**	.663**	.483**	.598**	.318**	.273*	0.105664	.409**		.780**	--
		Sig. (2-tailed)	0.0548181	0.461148	0.703641	0.305579	0.166782	0.0447813	0.263341	0.156905	2.48219e-06	0.0464191	0.150061	3.64373e-06	0.305582	0.470609	0.0631663	0.0672053	0.756871	0.00103904	0.390992	0.00223724	0.732447	0.0381897	0.606378	0.574501	0.462146	0.0340376	0.0710922	1.11009e-10	4.51162e-05	2.49546e-13	0.171995	3.26333e-18	0.0288951	0.137799	5.64512e-06	9.23115e-11	1.13919e-05	1.4329e-08	0.00544643	0.0175928	0.366929	0.000265124		1.67778e-16
		N	75	75	75	75	75	75	75	75	75	75	75	75	75	75	75	75	75	75	75	75	75	75	75	75	75	75	75	75	75	75	75	75	75	75	75	75	75	75	75	75	75	75	75	75	75
	Sniff Object/Floor (d)	Correlation Coefficient	.287*	-0.123873	-0.0308714	0.0679636	-0.151633	0.226007	0.218459	.233*	.444**	.283*	0.136211	.357**	-0.104254	0.192902	.328**	0.197099	-0.00782379	.312**	-0.0668054	.384**	0.205137	0.118806	0.0596444	-0.127097	0.140285	.259*	0.213007	.568**	.480**	.655**	.383**	.672**	.372**	0.0525319	.394**	.574**	.361**	.387**	0.11284	0.193968	0.0552736	0.200056		.750**	.773**	--
		Sig. (2-tailed)	0.0125933	0.289675	0.792607	0.562342	0.194065	0.0512107	0.0597074	0.0441877	6.73712e-05	0.0140427	0.243919	0.00164953	0.373396	0.097291	0.00409393	0.0900888	0.946885	0.00643848	0.569036	0.000670765	0.077475	0.310008	0.611234	0.277205	0.229966	0.0247701	0.0665307	1.06701e-07	1.31302e-05	1.8082e-10	0.000691377	4.28029e-11	0.00100525	0.654436	0.00047243	7.07283e-08	0.00144901	0.000613992	0.335098	0.0954193	0.637638	0.0852723		1.00958e-14	4.6795e-16
		N	75	75	75	75	75	75	75	75	75	75	75	75	75	75	75	75	75	75	75	75	75	75	75	75	75	75	75	75	75	75	75	75	75	75	75	75	75	75	75	75	75	75	75	75	75	75
	Sniff Participant (d)	Correlation Coefficient	0.115598	-0.181069	-0.0401761	-0.0262961	-0.145254	0.0936517	0.127522	0.132459	.410**	0.111013	0.141896	.491**	-0.0751325	0.223351	0.0853493	0.0992763	-0.0885645	.484**	0.00589956	.407**	-0.0407558	.293*	0.055719	-0.0676704	-0.0874985	0.177614	0.192387	.402**	.304**	.702**	.262*	.558**	.426**	-0.0478046	0.223047	.713**	0.200022	.243*	.327**	0.093118	0.217354	.261*		.578**	.545**	.578**	--
		Sig. (2-tailed)	0.323343	0.12003	0.732178	0.8228	0.213714	0.424184	0.275588	0.257274	0.000261234	0.343034	0.224607	7.80099e-06	0.521753	0.0540802	0.466576	0.396764	0.449892	1.08179e-05	0.959936	0.000286285	0.728462	0.010878	0.634926	0.564033	0.455387	0.127386	0.0982047	0.000347288	0.00800935	2.17273e-12	0.0229744	2.00077e-07	0.000137217	0.683803	0.0544168	7.07757e-13	0.0853273	0.0359602	0.00416708	0.42684	0.0610423	0.0237524		5.60228e-08	4.38202e-07	5.75136e-08
		N	75	75	75	75	75	75	75	75	75	75	75	75	75	75	75	75	75	75	75	75	75	75	75	75	75	75	75	75	75	75	75	75	75	75	75	75	75	75	75	75	75	75	75	75	75	75	75
	Stand (d)	Correlation Coefficient	0.172081	-0.0622173	-0.0584719	0.0916449	-0.161313	.287*	0.112408	0.132331	.416**	0.177841	0.109004	.382**	-0.0421506	0.095809	0.135251	0.198441	-0.101986	.317**	-0.0670529	.280*	0.0594942	0.0909108	0.0409402	-0.198955	0.0810691	.288*	0.0623163	.541**	.492**	.654**	.284*	.809**	.249*	0.136289	.505**	.739**	.408**	.577**	.301**	.370**	0.143482	.517**		.810**	.839**	.752**	.632**
		Sig. (2-tailed)	0.13987	0.595916	0.618271	0.434223	0.166782	0.0126874	0.336964	0.257737	0.000208092	0.126891	0.351892	0.00071556	0.719548	0.413541	0.247289	0.0878771	0.383936	0.00552905	0.567603	0.0150872	0.612134	0.437929	0.727282	0.0870411	0.489298	0.0121873	0.595331	5.42225e-07	7.42579e-06	1.97513e-10	0.0135887	1.56642e-18	0.0309936	0.243647	3.77738e-06	3.67475e-14	0.000278913	6.08558e-08	0.0087931	0.00109458	0.219416	2.03266e-06		1.33489e-18	5.13658e-21	7.08435e-15	1.15608e-09
		N	75	75	75	75	75	75	75	75	75	75	75	75	75	75	75	75	75	75	75	75	75	75	75	75	75	75	75	75	75	75	75	75	75	75	75	75	75	75	75	75	75	75	75	75	75	75	75
	Stretch (d)	Correlation Coefficient	.339**	-0.0581117	-0.000437987	.234*	-0.0753339	0.121366	0.125307	0.143668	0.128914	0.113842	0.0937002	0.148281	0.0557668	0.129238	0.014301	0.14238	-0.159784	0.1745	-0.0391399	0.159455	-0.0928888	-0.0278914	0.0428972	-0.131297	-0.0928946	0.108601	-0.0529128	0.219341	.616**	.244*	.375**	.470**	0.0918084	0.166341	.544**	.309**	-0.145811	-0.0373519	-0.000598437	.344**	0.116889	.239*		.533**	.424**	.510**	.324**
		Sig. (2-tailed)	0.00291462	0.620439	0.997024	0.043124	0.520635	0.299621	0.284084	0.218812	0.27034	0.330797	0.423943	0.204222	0.634635	0.269124	0.903076	0.223014	0.170893	0.134304	0.738835	0.171785	0.427984	0.812241	0.714791	0.261507	0.427956	0.353685	0.652092	0.0586596	4.06421e-09	0.0346892	0.000906273	2.07105e-05	0.4334	0.153778	4.51864e-07	0.00691615	0.211945	0.750367	0.995934	0.00254648	0.317933	0.0390736		8.48162e-07	0.000149877	2.933e-06	0.00455598
		N	75	75	75	75	75	75	75	75	75	75	75	75	75	75	75	75	75	75	75	75	75	75	75	75	75	75	75	75	75	75	75	75	75	75	75	75	75	75	75	75	75	75	75	75	75	75	75
	Wag Tail (d)	Correlation Coefficient	.227*	0.0203534	-0.0806285	0.0990562	-0.11703	0.22107	0.212333	0.135878	.272*	0.177624	0.156033	.238*	0.0717837	0.193014	0.102609	.230*	-0.11236	.236*	-0.167503	.290*	.232*	0.0153196	0.0186499	-0.124054	-0.144311	0.148976	0.113815	.401**	.660**	.410**	.477**	.544**	.292*	0.185197	.340**	.504**	0.148223	0.123666	-0.0149909	0.16578	0.0955348	.287*		.636**	.547**	.723**	.445**
		Sig. (2-tailed)	0.0499273	0.862398	0.49167	0.397817	0.317343	0.0566476	0.0674165	0.245084	0.0181398	0.127364	0.18129	0.0396262	0.540528	0.0970924	0.381025	0.0469098	0.337175	0.0418277	0.150883	0.011626	0.0453648	0.89621	0.873815	0.288965	0.216735	0.202084	0.330915	0.000365155	1.16752e-10	0.000254571	1.48718e-05	4.49402e-07	0.0109228	0.111675	0.00287711	3.97933e-06	0.204401	0.290486	0.898425	0.155189	0.414885	0.0124086		8.56208e-10	3.89926e-07	2.49659e-13	6.29945e-05
		N	75	75	75	75	75	75	75	75	75	75	75	75	75	75	75	75	75	75	75	75	75	75	75	75	75	75	75	75	75	75	75	75	75	75	75	75	75	75	75	75	75	75	75	75	75	75	75
	Walk (d)	Correlation Coefficient	0.107805	-0.144457	-0.00517055	-0.0383681	-0.138926	0.179222	-0.0140089	0.165055	.250*	0.0494594	0.0681025	.329**	-0.0495659	0.151731	0.0943368	0.131989	-0.0630334	.320**	-0.0379123	.262*	0.144791	-0.110174	0.0166124	-.307**	0.13045	.300**	0.0591384	.361**	.391**	.443**	.300**	.667**	.246*	0.0363742	.420**	.691**	.236*	.403**	.255*	.457**	0.123384	.440**		.639**	.625**	.691**	.547**
		Sig. (2-tailed)	0.357248	0.216264	0.964883	0.743806	0.234558	0.123921	0.905047	0.157029	0.0302796	0.673467	0.561541	0.00394514	0.672803	0.193773	0.420787	0.25898	0.591094	0.00511211	0.746747	0.0231621	0.215193	0.346714	0.887506	0.00740662	0.264625	0.00892243	0.614267	0.00148269	0.000523144	6.78034e-05	0.00897534	6.31339e-11	0.0331861	0.756697	0.000175706	6.66255e-12	0.0413264	0.000335513	0.0269915	3.8381e-05	0.291596	7.70334e-05		6.60706e-10	2.08466e-09	6.87368e-12	3.77519e-07
		N	75	75	75	75	75	75	75	75	75	75	75	75	75	75	75	75	75	75	75	75	75	75	75	75	75	75	75	75	75	75	75	75	75	75	75	75	75	75	75	75	75	75	75	75	75	75	75
	Yawn (c)	Correlation Coefficient	.425**	-0.218158	0.00291985	0.138867	-0.136098	-0.059446	.232*	.272*	.473**	.245*	0.19682	.401**	-0.0998716	0.161084	0.129753	.262*	-0.0590275	.457**	-0.0573885	.508**	-0.0726955	.457**	-0.0213743	0.0851217	0.0481325	0.053703	0.221056	.633**	.466**	.603**	.278*	.601**	.388**	0.183004	.435**	.317**	0.219158	0.173835	0.0441223	0.17458	0.11629	.280*		.641**	.582**	.551**	.480**
		Sig. (2-tailed)	0.000144275	0.0600691	0.980165	0.234758	0.244314	0.612422	0.0448787	0.0182613	1.83244e-05	0.0340182	0.0905549	0.000363304	0.393925	0.167393	0.267207	0.0231123	0.614932	3.77909e-05	0.624803	3.25224e-06	0.535384	3.70283e-05	0.855568	0.467769	0.68175	0.64724	0.056663	1.07874e-09	2.47683e-05	1.05711e-08	0.0156259	1.21117e-08	0.000576454	0.116055	9.64871e-05	0.00555459	0.0588761	0.135817	0.707009	0.134123	0.320437	0.0151081		5.90633e-10	4.45556e-08	3.07391e-07	1.329e-05
		N	75	75	75	75	75	75	75	75	75	75	75	75	75	75	75	75	75	75	75	75	75	75	75	75	75	75	75	75	75	75	75	75	75	75	75	75	75	75	75	75	75	75	75	75	75	75	75
*. Correlation is significant at the 0.05 level (2-tailed).
**. Correlation is significant at the 0.01 level (2-tailed).
[truncated: 5 more columns]

## Sheet: S2. Social + Physical Group
Table S2. Correlations Between Participant and Therapy Dog Behaviors, Social + Physical Group (N = 25)
Correlations
			Bite Lip (d)	Bite Nails (d)	Close Eyes (d)	Cross Arms (d)	Cry (d)	General Fidget (d)	General Scratch (d)	Grimace/Facial Tension (d)	Head Toward Dog (d)	Internal Tongue Movement (d)	Laugh (c)	Lean Towards Dog (d)	Play with Hair (d)	Reposition (c)	Sit on Hands (d)	Smile (c)	Stretch (c)	Talk to Dog (d)	Talk to Experimenter (d)	Talk to Handler (d)	Talk to Self (d)	Touch Dog (d)	Touch Face (c)	Human Yawn (c)	Bark (c)	Circle (d)	Ears Down (d)	Ears Twitch (c)	Groom (d)	Head toward Participant (d)	Jerk/Twitch (c)	Lay Alert (d)	Lay Down (d)	Lick Object (d)	Lift Paw (d)	Near Participant (d)	Pant (d)	Paw at Person (c)	Paws on Participant (d)	Scratch at Object/Floor (d)	Shake Head (c)	Shake Off (d)	Shift Head (c)	Shift Position (c)	Sit (d)	Sniff Object/Floor (d)	Sniff Participant (d)
Spearman's rho	Bite Lip (d)	Correlation Coefficient	--
		Sig. (2-tailed)
		N	25
	Bite Nails (d)	Correlation Coefficient	-0.34226	--
		Sig. (2-tailed)	0.0939928
		N	25	25
	Close Eyes (d)	Correlation Coefficient	-0.204517	0.0975337	--
		Sig. (2-tailed)	0.326766	0.642784
		N	25	25	25
	Cross Arms (d)	Correlation Coefficient	0.257768	0.248481	-0.182735	--
		Sig. (2-tailed)	0.213496	0.231035	0.381958
		N	25	25	25	25
	Cry (d)	Correlation Coefficient
		Sig. (2-tailed)
		N	25	25	25	25	25
	General Fidget (d)	Correlation Coefficient	-0.0790419	0.377879	0.087867	0.274057		--
		Sig. (2-tailed)	0.70724	0.0625466	0.676202	0.184945
		N	25	25	25	25	25	25
	General Scratch (d)	Correlation Coefficient	0.06937	0.00246966	-0.0327789	0.0952268		0.332376	--
		Sig. (2-tailed)	0.741786	0.990652	0.876391	0.650701		0.104518
		N	25	25	25	25	25	25	25
	Grimace/Facial Tension (d)	Correlation Coefficient	-0.00257125	-0.114791	0.129666	-0.335513		-0.132948	.421*	--
		Sig. (2-tailed)	0.990268	0.584804	0.536737	0.101088		0.526387	0.0362928
		N	25	25	25	25	25	25	25	25
	Head Toward Dog (d)	Correlation Coefficient	-0.286399	-0.0643198	0.237718	0.0445755		0.0915385	0.0283544	-0.163391	--
		Sig. (2-tailed)	0.16515	0.760023	0.252527	0.832441		0.663435	0.892975	0.435156
		N	25	25	25	25	25	25	25	25	25
	Internal Tongue Movement (d)	Correlation Coefficient	0.112917	0.010452	-0.304469	0.22783		0.332308	0.360731	0.124085	0.0184615	--
		Sig. (2-tailed)	0.590988	0.960453	0.138925	0.273378		0.104594	0.0764757	0.554552	0.930203
		N	25	25	25	25	25	25	25	25	25	25
	Laugh (c)	Correlation Coefficient	0.184137	0.157515	-0.131739	-0.0303316		0.00539604	0.00394646	0.0318594	0.0447101	0.0628253	--
		Sig. (2-tailed)	0.378254	0.45207	0.530189	0.885559		0.979577	0.985063	0.879834	0.831942	0.765444
		N	25	25	25	25	25	25	25	25	25	25	25
	Lean Towards Dog (d)	Correlation Coefficient	-0.184916	-0.166556	0.274711	-0.250035		-0.186297	0.0662111	0.346703	.563**	-0.026174	-0.0239152	--
		Sig. (2-tailed)	0.376205	0.426192	0.183858	0.228035		0.372586	0.753178	0.0895284	0.00340649	0.901164	0.909658
		N	25	25	25	25	25	25	25	25	25	25	25	25
	Play with Hair (d)	Correlation Coefficient	-0.18272	.465*	-0.311962	0.178302		0.126154	0	-0.0450868	0.227692	-0.216154	0.136057	-0.0107775	--
		Sig. (2-tailed)	0.381997	0.019259	0.128981	0.393808		0.547917	1	0.830546	0.273677	0.299377	0.516671	0.959222
		N	25	25	25	25	25	25	25	25	25	25	25	25	25
	Reposition (c)	Correlation Coefficient	-0.290505	0.139896	-0.0435929	-0.1739		0.207692	0.249676	0.315222	0.139231	0.180769	-.428*	0.341032	0.103846	--
		Sig. (2-tailed)	0.158907	0.504798	0.836085	0.405779		0.319146	0.228727	0.12482	0.506845	0.387188	0.0328904	0.0952556	0.621315
		N	25	25	25	25	25	25	25	25	25	25	25	25	25	25
	Sit on Hands (d)	Correlation Coefficient	0.136344	-0.0469871	-0.135706	-0.182735		-0.200936	0.138787	0.182556	0.162792	0.166879	-0.052559	.455*	-0.0415495	0.233631	--
		Sig. (2-tailed)	0.515779	0.823512	0.517766	0.381958		0.335489	0.508213	0.382432	0.436865	0.425281	0.802964	0.0224034	0.843674	0.261016
		N	25	25	25	25	25	25	25	25	25	25	25	25	25	25	25
	Smile (c)	Correlation Coefficient	0.0981837	0.159437	0.181121	-0.00881862		0.104777	.435*	0.336164	0.0104006	0.0527736	.576**	0.0925212	0.00693375	-0.172188	-0.0883436	--
		Sig. (2-tailed)	0.64056	0.446501	0.386248	0.966629		0.618175	0.0299143	0.100386	0.960647	0.802175	0.00260898	0.660033	0.973759	0.410486	0.674539
		N	25	25	25	25	25	25	25	25	25	25	25	25	25	25	25	25
	Stretch (c)	Correlation Coefficient	0.133756	0.145275	0.0360559	0.185428		0.0324968	0.29786	.444*	-0.0344545	.419*	-0.0763138	0.379683	-0.00587292	0.295604	0.0312022	0.197438	--
		Sig. (2-tailed)	0.523854	0.488388	0.864141	0.37486		0.877447	0.148144	0.0262379	0.870124	0.0373177	0.716931	0.0612036	0.977773	0.151389	0.882296	0.344144
		N	25	25	25	25	25	25	25	25	25	25	25	25	25	25	25	25	25
	Talk to Dog (d)	Correlation Coefficient	-0.0219138	-0.0412741	.470*	-0.0531455		-0.143491	0.124103	0.235042	0.253748	-0.202138	0.32736	0.365851	-0.123551	-0.13528	-0.21915	.660**	0.229055	--
		Sig. (2-tailed)	0.917192	0.844698	0.0177118	0.800808		0.4938	0.554496	0.258064	0.220975	0.332545	0.110183	0.0720909	0.556272	0.519092	0.292564	0.00033078	0.270738
		N	25	25	25	25	25	25	25	25	25	25	25	25	25	25	25	25	25	25
	Talk to Experimenter (d)	Correlation Coefficient	-0.101625	-0.147132	0.216602	0.115566		0.0969231	0.140984	0.179576	0.236923	0.0884615	-0.116786	0.0115473	0.115385	-0.0515385	-0.166198	0.343991	0.0591208	0.337418	--
		Sig. (2-tailed)	0.628835	0.482786	0.298351	0.582253		0.644876	0.501455	0.39038	0.254163	0.674128	0.57825	0.956312	0.58285	0.806718	0.4272	0.0922337	0.778929	0.0990445
		N	25	25	25	25	25	25	25	25	25	25	25	25	25	25	25	25	25	25	25
	Talk to Handler (d)	Correlation Coefficient	-0.140633	-0.0747718	0.0756065	-0.368711		0.0569231	0.0685231	.497*	0.0207692	-0.00307692	.568**	0.230177	-0.0469231	0.0876923	-0.217965	.494*	0.137818	.421*	0.125385	--
		Sig. (2-tailed)	0.502532	0.722427	0.71945	0.0697264		0.786958	0.744835	0.0114667	0.921504	0.988354	0.00307392	0.268333	0.823749	0.676811	0.295247	0.0121103	0.511209	0.0358694	0.55038
		N	25	25	25	25	25	25	25	25	25	25	25	25	25	25	25	25	25	25	25	25
	Talk to Self (d)	Correlation Coefficient	-0.113325	-0.207104	-0.0751958	-0.101255		0.254762	0.347804	0.283615	0.0849208	0.141535	-0.056734	0.141644	-0.113228	0.339683	-0.0751958	0.297681	0.172894	0.115102	0.254762	0.283069	--
		Sig. (2-tailed)	0.589641	0.320549	0.720915	0.630092		0.219072	0.0884469	0.169479	0.68651	0.499769	0.78765	0.499436	0.589961	0.0966568	0.720915	0.1484	0.408541	0.583778	0.219072	0.170337
		N	25	25	25	25	25	25	25	25	25	25	25	25	25	25	25	25	25	25	25	25	25
	Touch Dog (d)	Correlation Coefficient	-0.289478	0.0803998	0.342613	0.0225629		-0.332308	-0.097665	0.11869	0.226923	-0.0761538	0.387359	0.240955	-0.27	-0.19	0.000681139	0.309322	0.0305392	0.363223	-0.0538462	0.363077	-0.0283069	--
		Sig. (2-tailed)	0.160452	0.702434	0.0936317	0.914748		0.104594	0.642334	0.572025	0.275345	0.7175	0.0557364	0.245931	0.191796	0.362987	0.997422	0.132424	0.88478	0.0743163	0.798235	0.0744419	0.893153
		N	25	25	25	25	25	25	25	25	25	25	25	25	25	25	25	25	25	25	25	25	25	25
	Touch Face (c)	Correlation Coefficient	-0.0945489	.483*	-0.0415975	-0.0132228		0.248364	0.238531	0.0241127	0.202156	0.224875	-0.132549	0.212331	0.348479	.541**	0.0473939	0.0543772	0.391197	0.0140917	-0.175972	-0.108587	0.127528	-0.306508	--
		Sig. (2-tailed)	0.653034	0.0144675	0.843495	0.94998		0.231263	0.250859	0.908915	0.332501	0.279818	0.527641	0.308211	0.0877889	0.00526786	0.822008	0.796286	0.0531491	0.946698	0.400118	0.605386	0.543529	0.136167
		N	25	25	25	25	25	25	25	25	25	25	25	25	25	25	25	25	25	25	25	25	25	25	25
	Human Yawn (c)	Correlation Coefficient	-0.126579	0.23389	-0.0596504	-0.139872		0.225711	0.255289	.426*	-0.057299	0.192416	0.202524	0.104225	0.181576	0.224937	0.103874	0.0713464	0.0758669	-0.28927	-0.337599	0.327146	-0.128222	0.132407	0.143413	--
		Sig. (2-tailed)	0.546558	0.260473	0.776997	0.50487		0.277986	0.218088	0.0338562	0.785583	0.356801	0.331604	0.620036	0.385037	0.279682	0.621221	0.734684	0.718523	0.160766	0.0988522	0.110429	0.54132	0.528087	0.494037
		N	25	25	25	25	25	25	25	25	25	25	25	25	25	25	25	25	25	25	25	25	25	25	25	25
	Bark (c)	Correlation Coefficient	-0.113325	0.207104	-0.0751958	.405*		0.198148	0.0289837	-0.297796	0.141535	0.339683	0.297853	-0.0849862	-0.169842	-0.141535	-0.0751958	0.099227	0.0720392	0.0575512	-0.0283069	0.141535	-0.0416667	0.283069	-0.0283396	0.0427408	--
		Sig. (2-tailed)	0.589641	0.320549	0.720915	0.0445971		0.342376	0.890614	0.148236	0.499769	0.0966568	0.148154	0.68628	0.41699	0.499769	0.720915	0.636996	0.7322	0.784661	0.893153	0.499769	0.843238	0.170337	0.893031	0.839248
		N	25	25	25	25	25	25	25	25	25	25	25	25	25	25	25	25	25	25	25	25	25	25	25	25	25
	Circle (d)	Correlation Coefficient	0.261712	-0.0529532	-0.108536	-0.146149		-0.016343	0.100402	.411*	-0.166699	0.147087	0.0524086	0.109583	-0.111132	0.0588348	0.361786	-0.291354	0.179677	-0.263325	-0.268025	0.0882523	-0.0601407	-0.145453	-0.0269971	0.263215	-0.0601407	--
		Sig. (2-tailed)	0.206326	0.801515	0.605557	0.485745		0.938197	0.632991	0.0412515	0.425789	0.48292	0.803517	0.602063	0.596904	0.779972	0.0755559	0.157637	0.390111	0.203441	0.195192	0.674858	0.77521	0.487849	0.898072	0.203638	0.77521
		N	25	25	25	25	25	25	25	25	25	25	25	25	25	25	25	25	25	25	25	25	25	25	25	25	25	25
	Ears Down (d)	Correlation Coefficient	-0.113325	0.0295863	-0.0751958	-0.101255		0.113228	0.289837	0.226892	-0.283069	0.226455	-0.184385	0.0566575	-0.0566139	0.113228	-0.0751958	0.099227	0.345788	0.25898	0	0.0283069	-0.0416667	-0.339683	0.127528	-0.0427408	-0.0416667	-0.0601407	--
		Sig. (2-tailed)	0.589641	0.888353	0.720915	0.630092		0.589961	0.159911	0.275412	0.170337	0.276362	0.377599	0.78793	0.788089	0.589961	0.720915	0.636996	0.0904341	0.211275	1	0.893153	0.843238	0.0966568	0.543529	0.839248	0.843238	0.77521
		N	25	25	25	25	25	25	25	25	25	25	25	25	25	25	25	25	25	25	25	25	25	25	25	25	25	25	25
	Ears Twitch (c)	Correlation Coefficient	0.255087	-0.0324864	0.289327	0.106455		0.16551	-0.0155145	-0.348396	-0.21524	-0.00466224	-0.321209	-0.350326	-0.121995	-0.338401	-0.142083	-0.177633	-0.145941	-0.0732637	0.181439	-.530**	-0.328835	-.511**	-0.0105022	-0.286079	-0.0428915	-0.0503522	0.257349	--
		Sig. (2-tailed)	0.218464	0.877486	0.160681	0.612527		0.429144	0.941324	0.0878696	0.301474	0.982354	0.117432	0.0860072	0.561291	0.0980031	0.498091	0.395614	0.486375	0.727816	0.385402	0.00648263	0.108494	0.00911897	0.960263	0.165643	0.838689	0.811088	0.214268
		N	25	25	25	25	25	25	25	25	25	25	25	25	25	25	25	25	25	25	25	25	25	25	25	25	25	25	25	25
	Groom (d)	Correlation Coefficient	0.0334473	-0.0711057	0.122462	0.12968		0.212597	.550**	0.158073	0.137405	-0.114578	0.0248929	0.0604687	0.0823532	-0.0908571	-0.267514	0.372282	0.0234642	0.356706	0.159783	0.040729	0.329404	0.00671358	0.0436887	-0.000225264	-0.148232	-0.213954	0.263523	-0.0113029	--
		Sig. (2-tailed)	0.873891	0.735548	0.559784	0.536693		0.307593	0.00440102	0.450449	0.512489	0.585504	0.90598	0.774015	0.695538	0.665797	0.196079	0.0668588	0.911355	0.0800626	0.445502	0.846725	0.107848	0.974592	0.83573	0.999147	0.479482	0.304441	0.203089	0.957236
		N	25	25	25	25	25	25	25	25	25	25	25	25	25	25	25	25	25	25	25	25	25	25	25	25	25	25	25	25	25
	Head toward Participant (d)	Correlation Coefficient	0.290505	-0.0297479	0.0578969	0.245991		0.103077	0.19218	-0.100578	0.135385	0.210769	-0.166892	-0.102386	-0.0146154	-0.257692	-0.0143039	0.118644	0.117458	0.251793	0.393077	-.408*	-0.141535	-0.366923	0.139777	-.404*	-0.169842	0.102961	0.254762	.517**	0.1844	--
		Sig. (2-tailed)	0.158907	0.887747	0.783398	0.235896		0.623916	0.357404	0.632393	0.518766	0.311867	0.425246	0.626254	0.94472	0.213635	0.945896	0.572175	0.576048	0.224674	0.0519163	0.0430771	0.499769	0.0711974	0.505164	0.0450785	0.41699	0.624308	0.219072	0.00811842	0.377562
		N	25	25	25	25	25	25	25	25	25	25	25	25	25	25	25	25	25	25	25	25	25	25	25	25	25	25	25	25	25	25
	Jerk/Twitch (c)	Correlation Coefficient	.473*	-0.155716	-0.268213	0.214772		0.0560927	0.0872994	-0.034395	-0.0112185	-0.0166035	0.128837	0.010329	0.0892996	0.167381	0.291259	-0.0467411	-0.116029	-0.0278265	-0.212704	-0.134174	0.297239	-0.178151	0.0480709	-0.208462	-0.148619	0.0953393	-0.148619	-0.142789	0.145954	-0.116224	--
		Sig. (2-tailed)	0.0169219	0.457318	0.194868	0.302552		0.789997	0.678183	0.870347	0.957555	0.937214	0.539365	0.960918	0.671209	0.423871	0.157778	0.824422	0.580732	0.894957	0.307344	0.522547	0.149033	0.394217	0.819506	0.317316	0.478321	0.650314	0.478321	0.495938	0.486336	0.580092
		N	25	25	25	25	25	25	25	25	25	25	25	25	25	25	25	25	25	25	25	25	25	25	25	25	25	25	25	25	25	25	25
	Lay Alert (d)	Correlation Coefficient	0.217622	-0.246827	0.274499	.428*		0.206923	.419*	-0.127939	0.331538	0.128462	-0.117171	0.114704	-0.106923	-0.225385	-0.164155	0.298922	0.0896599	.413*	.488*	-0.208462	0.0849208	-0.0376923	-0.0670004	-0.217581	0.113228	-0.299077	0.169842	.432*	.605**	.539**	-0.012116	--
		Sig. (2-tailed)	0.296026	0.234256	0.184209	0.0329967		0.320982	0.0370823	0.542222	0.105449	0.540559	0.576988	0.585091	0.610957	0.278701	0.432985	0.146635	0.669956	0.0402431	0.0132317	0.317317	0.68651	0.858035	0.750326	0.296119	0.589961	0.146415	0.41699	0.0308608	0.00135176	0.0054093	0.954162
		N	25	25	25	25	25	25	25	25	25	25	25	25	25	25	25	25	25	25	25	25	25	25	25	25	25	25	25	25	25	25	25	25
	Lay Down (d)	Correlation Coefficient	-0.100599	0.0828118	-0.158024	-.445*		-0.240769	-0.30796	0.133334	-0.204615	-0.182308	0.185393	-0.113164	-0.00692308	0.197692	0.162792	-0.104006	-0.166008	-0.258049	-.461*	0.266154	-0.0283069	0.174615	0.00693108	0.211774	-0.113228	0.0751779	-0.283069	-.495*	-.513**	-.591**	0.111737	-.881**	--
		Sig. (2-tailed)	0.632323	0.693922	0.450591	0.0257366		0.246306	0.134226	0.525178	0.326528	0.383092	0.374954	0.590172	0.973799	0.343511	0.436865	0.620774	0.427737	0.21298	0.0204474	0.198449	0.893153	0.403819	0.973769	0.309513	0.589961	0.720979	0.170337	0.0118067	0.00867544	0.0018747	0.594898	6.30847e-09
		N	25	25	25	25	25	25	25	25	25	25	25	25	25	25	25	25	25	25	25	25	25	25	25	25	25	25	25	25	25	25	25	25	25
	Lick Object (d)	Correlation Coefficient	0.11362	0.305416	-0.135706	0.381551		-0.157343	0.0997316	0.0457244	-0.128735	-0.230225	0.322863	-0.186094	.458*	-0.285397	-0.135706	0.279016	0.00970734	0.153024	-0.0687951	-0.184589	-0.0751958	0.16756	-0.0627373	0.123072	-0.0751958	-0.108536	-0.0751958	-0.0774062	0.340436	0.029289	0.254306	0.141677	-0.144402	--
		Sig. (2-tailed)	0.588664	0.13764	0.517766	0.0598364		0.45257	0.635276	0.828185	0.539689	0.26823	0.11545	0.373117	0.0211879	0.166698	0.517766	0.176804	0.963268	0.465227	0.743855	0.377064	0.720915	0.423367	0.765764	0.557815	0.720915	0.605557	0.720915	0.713046	0.0958728	0.889468	0.219927	0.499334	0.491033
		N	25	25	25	25	25	25	25	25	25	25	25	25	25	25	25	25	25	25	25	25	25	25	25	25	25	25	25	25	25	25	25	25	25	25
	Lift Paw (d)	Correlation Coefficient	0.0514459	-0.096957	0.185618	0.286143		-0.197576	0.136922	-0.127948	0.350577	-0.351782	-0.123747	0.103687	0.234923	-0.199985	-0.160015	0.118246	-0.112827	0.368628	0.33853	-0.35901	-0.0886659	-0.0915596	0.0277409	-0.290439	-0.0886659	-0.127978	-0.0886659	0.287203	0.364502	.536**	-0.0330315	.595**	-.564**	.457*	--
		Sig. (2-tailed)	0.807059	0.644759	0.374364	0.165544		0.343801	0.513984	0.542193	0.0857675	0.0846226	0.555639	0.621854	0.258313	0.337828	0.444833	0.573475	0.591285	0.0697943	0.0978675	0.0779938	0.673416	0.663361	0.895278	0.159007	0.673416	0.542096	0.673416	0.163913	0.0732269	0.0057382	0.875446	0.00169976	0.0033326	0.0217764
		N	25	25	25	25	25	25	25	25	25	25	25	25	25	25	25	25	25	25	25	25	25	25	25	25	25	25	25	25	25	25	25	25	25	25	25
	Near Participant (d)	Correlation Coefficient	0.149435	0.0268762	-0.171871	0.242115		0.0265435	-0.14863	-.417*	-0.2082	0.00663586	-.613**	-0.0415061	-0.025714	0.109492	0.110908	-.456*	0.118215	-0.201529	-0.116957	-.702**	-0.183145	-.586**	0.242904	-.464*	-0.183145	-0.0352462	0.36629	.499*	-0.112935	.443*	0.0866165	0.146818	-0.33677	-0.128536	0.175378	--
		Sig. (2-tailed)	0.475883	0.898526	0.411362	0.243594		0.899776	0.478289	0.0382056	0.317937	0.974886	0.00110974	0.843835	0.902893	0.602366	0.597649	0.0220718	0.573576	0.334036	0.577689	9.26401e-05	0.380873	0.00210073	0.242014	0.0195224	0.380873	0.867165	0.0717241	0.0111923	0.590928	0.0265893	0.68057	0.483728	0.0997361	0.540322	0.401737
		N	25	25	25	25	25	25	25	25	25	25	25	25	25	25	25	25	25	25	25	25	25	25	25	25	25	25	25	25	25	25	25	25	25	25	25	25
	Pant (d)	Correlation Coefficient	0.0454482	-0.135978	0.303981	-0.182735		0.285397	0.166684	-0.090425	-0.0592591	0.113069	-0.0733779	0.0095433	-0.318773	-0.273137	-0.135706	0.158609	-0.0637911	0.220535	0.186632	-0.143039	-0.0751958	-0.305832	-0.106381	-0.149469	-0.0751958	-0.108536	.501*	.553**	.410*	.461*	-0.268213	.485*	-.531**	-0.135706	0.185618	0.260745	--
		Sig. (2-tailed)	0.829208	0.516919	0.139593	0.381958		0.166698	0.42583	0.667297	0.778424	0.590485	0.727407	0.963889	0.120398	0.186484	0.517766	0.448896	0.76194	0.289448	0.371712	0.495175	0.720915	0.137078	0.612778	0.475781	0.720915	0.605557	0.0106838	0.00412652	0.0419117	0.0203358	0.194868	0.0140046	0.00635763	0.517766	0.374364	0.20807
		N	25	25	25	25	25	25	25	25	25	25	25	25	25	25	25	25	25	25	25	25	25	25	25	25	25	25	25	25	25	25	25	25	25	25	25	25	25
	Paw at Person (c)	Correlation Coefficient	-0.0289383	-0.055404	0.156815	0.042232		0.240946	-0.0690779	-0.391086	0.389128	0.166253	-0.293371	-0.0229075	0.0879454	-0.144568	-0.160015	-0.191244	-0.0778754	-0.0814411	0.35901	-.449*	-0.0886659	-.398*	0.249668	-0.224347	-0.0886659	-0.127978	-0.0886659	.540**	0.0427589	.623**	-0.316259	.439*	-.502*	-0.160015	.430*	0.35855	.477*	--
		Sig. (2-tailed)	0.890784	0.79252	0.454109	0.841138		0.245948	0.742837	0.0532225	0.0545316	0.427045	0.154649	0.91345	0.675928	0.490529	0.444833	0.359793	0.711379	0.698755	0.0779938	0.0242255	0.673416	0.0490657	0.228743	0.280978	0.673416	0.542096	0.673416	0.0052973	0.839181	0.00088284	0.123517	0.0283224	0.0104916	0.444833	0.031835	0.0784032	0.0159488
		N	25	25	25	25	25	25	25	25	25	25	25	25	25	25	25	25	25	25	25	25	25	25	25	25	25	25	25	25	25	25	25	25	25	25	25	25	25	25
	Paws on Participant (d)	Correlation Coefficient	-0.113325	-0.207104	-0.0751958	-0.101255		-0.198148	0.0579674	-0.198531	0.339683	-0.0283069	-0.312037	0.0283287	0.198148	0.226455	-0.0751958	-0.24098	-0.0576314	0.0287756	0.226455	-0.254762	-0.0416667	-0.311376	0.311736	-0.199457	-0.0416667	-0.0601407	-0.0416667	0.285943	-0.148232	0.339683	-0.148619	0.226455	-0.226455	-0.0751958	.532**	0.244193	-0.0751958	.532**	--
		Sig. (2-tailed)	0.589641	0.320549	0.720915	0.630092		0.342376	0.78314	0.341427	0.0966568	0.893153	0.128884	0.893072	0.342376	0.276362	0.720915	0.245881	0.784368	0.891395	0.276362	0.219072	0.843238	0.12974	0.129273	0.339133	0.843238	0.77521	0.843238	0.165853	0.479482	0.0966568	0.478321	0.276362	0.276362	0.720915	0.00619625	0.239447	0.720915	0.00619625
		N	25	25	25	25	25	25	25	25	25	25	25	25	25	25	25	25	25	25	25	25	25	25	25	25	25	25	25	25	25	25	25	25	25	25	25	25	25	25	25
	Scratch at Object/Floor (d)	Correlation Coefficient
		Sig. (2-tailed)
		N	25	25	25	25	25	25	25	25	25	25	25	25	25	25	25	25	25	25	25	25	25	25	25	25	25	25	25	25	25	25	25	25	25	25	25	25	25	25	25	25
	Shake Head (c)	Correlation Coefficient	-0.0809275	0.185459	0.0397769	-0.188002		0.0354878	-0.0947502	0.0193534	-0.136111	-.463*	0.164536	0.143409	0.135213	0.117694	0.0214795	0.0733346	0.00914573	0.0911016	-.474*	0.156775	0.181836	0.123533	0.080502	0.170924	-0.148775	0.0143159	-0.148775	-0.32354	-0.0454786	-.437*	0.256289	-0.354429	.406*	0.284803	-0.133672	-0.0242199	-0.268494	-0.316591	-0.148775		--
		Sig. (2-tailed)	0.700569	0.37478	0.850268	0.368148		0.866263	0.652341	0.92684	0.516503	0.0198614	0.431903	0.494048	0.519301	0.575279	0.918827	0.727562	0.965392	0.664949	0.0167007	0.454224	0.384344	0.556327	0.702072	0.413984	0.477855	0.945851	0.477855	0.114645	0.829095	0.0289054	0.216227	0.0821476	0.0439849	0.167622	0.524119	0.908512	0.194382	0.123102	0.477855
		N	25	25	25	25	25	25	25	25	25	25	25	25	25	25	25	25	25	25	25	25	25	25	25	25	25	25	25	25	25	25	25	25	25	25	25	25	25	25	25	25	25
	Shake Off (d)	Correlation Coefficient	-0.10793	-0.00486845	0.0187477	0.345047		0.0796081	0.167792	-0.0574878	0.138467	-0.335371	-.455*	-0.0720415	0.329019	0.126187	-0.309338	-0.227318	0.16488	-0.13581	0.111367	-0.254492	0.218154	-0.116025	0.0570195	-0.0575429	-0.171407	-0.020692	-0.171407	0.0183931	0.223467	0.0652109	-0.0676847	0.220616	-0.228662	0.229847	.418*	0.165295	-0.309338	0.139932	0.342814		0.207471	--
		Sig. (2-tailed)	0.607582	0.981574	0.929124	0.0911732		0.705235	0.422717	0.784893	0.509201	0.101241	0.0221869	0.732192	0.108285	0.547809	0.132404	0.274488	0.430927	0.517442	0.596126	0.219578	0.294817	0.580747	0.786605	0.784691	0.412645	0.921794	0.412645	0.930461	0.28292	0.756795	0.747857	0.289265	0.271584	0.269038	0.037689	0.429752	0.132404	0.504687	0.0934271		0.319674
		N	25	25	25	25	25	25	25	25	25	25	25	25	25	25	25	25	25	25	25	25	25	25	25	25	25	25	25	25	25	25	25	25	25	25	25	25	25	25	25	25	25	25
	Shift Head (c)	Correlation Coefficient
		Sig. (2-tailed)
		N	25	25	25	25	25	25	25	25	25	25	25	25	25	25	25	25	25	25	25	25	25	25	25	25	25	25	25	25	25	25	25	25	25	25	25	25	25	25	25	25	25	25	25
	Shift Position (c)	Correlation Coefficient	0.116622	-0.190731	0.0613616	0.380083		0.252551	.428*	-0.1865	0.252551	-0.00384986	-.446*	0.0231169	0.0384986	-0.0646776	0.0337489	-0.0828996	-0.0834758	0.0645743	0.245621	-.582**	0.141671	-0.379596	0.0267874	-0.281927	-0.113337	-0.0858834	0.226673	.454*	.584**	.589**	0.19292	.755**	-.734**	0.175903	.628**	.465*	.430*	.464*	0.283342		-0.185479	.413*		--
		Sig. (2-tailed)	0.578787	0.361109	0.770765	0.0609087		0.223236	0.0327722	0.372058	0.223236	0.985428	0.0254466	0.912662	0.855029	0.758727	0.872763	0.693613	0.691585	0.759101	0.236624	0.00226797	0.499352	0.0612678	0.898859	0.172143	0.589601	0.683135	0.275888	0.0227464	0.00216692	0.00193205	0.355519	1.27213e-05	2.98933e-05	0.400306	0.000770994	0.0193086	0.0318243	0.0193895	0.169908		0.374728	0.0403789
		N	25	25	25	25	25	25	25	25	25	25	25	25	25	25	25	25	25	25	25	25	25	25	25	25	25	25	25	25	25	25	25	25	25	25	25	25	25	25	25	25	25	25	25	25
	Sit (d)	Correlation Coefficient	0.156608	0.00905542	0.193884	0.367947		0.191392	0.274194	-0.149542	0.159887	0.233136	-0.300721	0.189175	-0.0559211	-0.122081	0.0683476	-0.00907161	0.212872	0.0972803	0.17564	-.469*	-0.231869	-0.25834	0.151792	-0.00951387	0.086951	-0.00836687	0.347804	.607**	0.313	.600**	-0.207681	.758**	-.859**	0.0809012	.503*	.483*	.574**	.532**	0.231869		-0.379461	0.116197		.689**	--
		Sig. (2-tailed)	0.454712	0.965734	0.353074	0.070352		0.359415	0.184718	0.475562	0.445202	0.262057	0.144102	0.365114	0.790626	0.561013	0.745467	0.965672	0.306952	0.643651	0.401024	0.0179129	0.264731	0.212446	0.46887	0.964	0.6794	0.968338	0.0884469	0.00129178	0.127646	0.00151582	0.319174	1.153e-05	3.79591e-08	0.700661	0.0103304	0.014397	0.00269797	0.00623569	0.264731		0.0613679	0.580181		0.000141197
		N	25	25	25	25	25	25	25	25	25	25	25	25	25	25	25	25	25	25	25	25	25	25	25	25	25	25	25	25	25	25	25	25	25	25	25	25	25	25	25	25	25	25	25	25	25
	Sniff Object/Floor (d)	Correlation Coefficient	0.280563	-0.211852	0.0172441	0.187656		0.185999	.499*	0.0324533	0.0488842	.530**	-0.263062	0.0847184	-0.356497	0.0838583	0.363885	0.160412	0.199658	0.0791865	0.324703	-0.377164	0.146251	-0.26787	0.0298419	-0.213031	0.0585005	0.0455967	0.351003	.429*	0.211125	.605**	0.0811469	.626**	-.612**	-0.111558	0.234037	0.370278	.521**	0.332383	0.175502		-.463*	-0.145051		.606**	.681**	--
		Sig. (2-tailed)	0.174316	0.30933	0.934796	0.369046		0.373367	0.0111268	0.877611	0.816502	0.00645579	0.203911	0.68722	0.0802518	0.69024	0.0737513	0.443688	0.338636	0.706728	0.113273	0.0630853	0.485437	0.195461	0.887395	0.306583	0.781192	0.828658	0.0853611	0.0324673	0.311031	0.00134631	0.699793	0.000825252	0.00115877	0.59549	0.260164	0.0684563	0.00759636	0.10451	0.401399		0.0198308	0.489065		0.00133429	0.000179952
		N	25	25	25	25	25	25	25	25	25	25	25	25	25	25	25	25	25	25	25	25	25	25	25	25	25	25	25	25	25	25	25	25	25	25	25	25	25	25	25	25	25	25	25	25	25	25
	Sniff Participant (d)	Correlation Coefficient	0.0790242	-0.280808	-0.030617	-0.0449237		0.101345	0.0166843	-0.19014	0.0691533	0.0977685	-.406*	-0.128867	-0.214614	0.0325895	-0.0207632	-0.245992	0.0034389	-0.0121204	0.100551	-0.272639	-0.219377	-0.288934	-0.14921	-0.214431	-0.219377	-0.0430635	0.292503	0.242487	-0.0566547	.501*	-0.23208	0.215409	-0.144268	-0.306874	0.0728255	.417*	0.323062	0.388403	0.321753		-0.0956217	0.160147		0.331579	0.227476	0.346817	--
		Sig. (2-tailed)	0.707303	0.173925	0.884489	0.83115		0.629786	0.936909	0.362626	0.742565	0.64198	0.0438973	0.539269	0.302917	0.877101	0.921526	0.235893	0.986984	0.954146	0.632487	0.18732	0.292051	0.161276	0.476556	0.303339	0.292051	0.83805	0.155931	0.24285	0.78794	0.0107096	0.264285	0.301087	0.491438	0.135676	0.729384	0.0383204	0.115213	0.0550232	0.116778		0.649343	0.444453		0.105403	0.274144	0.0894157
		N	25	25	25	25	25	25	25	25	25	25	25	25	25	25	25	25	25	25	25	25	25	25	25	25	25	25	25	25	25	25	25	25	25	25	25	25	25	25	25	25	25	25	25	25	25	25	25
	Stand (d)	Correlation Coefficient	0.136304	-0.00540014	-0.0823491	.400*		0.342985	0.263287	-0.330107	0.0313972	0.0822686	-.445*	-0.23745	0.0393459	-0.113666	-0.0658089	-0.126977	-0.0604841	-0.136556	0.272242	-.640**	0.117001	-.527**	0.0612754	-0.334848	-0.0585005	0.00168877	0.175502	.547**	0.364671	.699**	-0.010665	.589**	-.705**	0.123524	.540**	.597**	.479*	.606**	0.292503		-0.249498	0.395116		.848**	.673**	.619**	0.395688
		Sig. (2-tailed)	0.515906	0.979562	0.695552	0.0477112		0.0932533	0.20351	0.107053	0.881565	0.695836	0.0258598	0.253077	0.851873	0.588514	0.754632	0.545288	0.773959	0.51512	0.18799	0.000572163	0.577545	0.00684385	0.771078	0.101807	0.781192	0.993608	0.401399	0.00469615	0.0730835	9.9788e-05	0.959647	0.00195001	8.19064e-05	0.556358	0.0053027	0.00161417	0.015336	0.00131623	0.155931		0.229069	0.0506046		8.8608e-08	0.00022422	0.000977887	0.0502414
		N	25	25	25	25	25	25	25	25	25	25	25	25	25	25	25	25	25	25	25	25	25	25	25	25	25	25	25	25	25	25	25	25	25	25	25	25	25	25	25	25	25	25	25	25	25	25	25
	Stretch (d)	Correlation Coefficient	0.389945	0.0498348	-0.135706	.753**		0.0149851	0.255257	-0.0955434	-0.121243	-0.139634	-0.0331054	-0.235174	0.196168	-0.1553	-0.135706	0.129616	0.0180279	0.0702803	0.0769688	-0.336483	-0.0751958	0.00817367	-0.165708	-0.116216	-0.0751958	-0.108536	-0.0751958	0.0729338	0.391164	0.246572	0.365962	.462*	-.410*	.618**	.508**	0.174809	-0.135706	-0.160015	-0.0751958		-0.0536989	.439*		.480*	0.315236	0.195667	-0.0320247
		Sig. (2-tailed)	0.0539823	0.812995	0.517766	1.38119e-05		0.943324	0.218147	0.649612	0.563727	0.505604	0.87517	0.257789	0.34732	0.458536	0.517766	0.536895	0.931839	0.738512	0.714601	0.100044	0.720915	0.969069	0.428583	0.58012	0.720915	0.605557	0.720915	0.728996	0.0531705	0.234755	0.071998	0.0199204	0.041772	0.000989186	0.00956217	0.40329	0.517766	0.444833	0.720915		0.798776	0.0282521		0.0151731	0.124802	0.348577	0.879215
		N	25	25	25	25	25	25	25	25	25	25	25	25	25	25	25	25	25	25	25	25	25	25	25	25	25	25	25	25	25	25	25	25	25	25	25	25	25	25	25	25	25	25	25	25	25	25	25
	Wag Tail (d)	Correlation Coefficient	0.272633	0.179563	-0.246687	.411*		0.331523	.449*	-0.144682	-0.223801	-0.0213586	-0.100971	-0.276947	0.207086	0.0455032	-0.00246687	0.251119	0.00378131	-0.0363444	0.10215	-0.314808	0.170865	-0.352882	0.0478801	-0.150965	-0.136692	-0.197297	0.273383	0.187144	.558**	0.28602	0.301204	.422*	-.432*	0.364275	0.2487	0.333458	0.268067	-0.0465403	-0.136692		-0.0667031	0.231573		.545**	0.362269	.456*	0.0988372
		Sig. (2-tailed)	0.18733	0.390418	0.23453	0.0414847		0.105465	0.024428	0.490184	0.282181	0.919283	0.631058	0.18017	0.320592	0.829004	0.990663	0.22596	0.985688	0.863064	0.627055	0.125343	0.414148	0.0835871	0.820211	0.471324	0.5147	0.344496	0.186071	0.370378	0.00377888	0.165734	0.143427	0.0358105	0.031123	0.0734196	0.230611	0.103325	0.195121	0.825164	0.5147		0.7514	0.265361		0.00487137	0.0751371	0.0220292	0.638327
		N	25	25	25	25	25	25	25	25	25	25	25	25	25	25	25	25	25	25	25	25	25	25	25	25	25	25	25	25	25	25	25	25	25	25	25	25	25	25	25	25	25	25	25	25	25	25	25
	Walk (d)	Correlation Coefficient	-0.00743545	-0.328066	0.0863405	0.098989		-0.0733623	0.00855755	-0.216324	-0.137438	-0.237731	-.583**	-0.125463	-0.174584	0.0668619	-0.246687	-0.229727	-0.0293051	0.113281	0.319451	-.419*	0.205037	-.436*	-0.122722	-.690**	-0.136692	-0.197297	0.273383	.458*	0.121032	0.323166	0.0601324	0.325952	-0.371455	-0.0616718	.467*	.592**	0.313293	0.274879	.410*		-0.091649	0.368574		.530**	0.252923	0.332016	0.317622
		Sig. (2-tailed)	0.971861	0.109372	0.681535	0.637809		0.727463	0.967617	0.298986	0.512384	0.252499	0.00224537	0.55013	0.403905	0.750827	0.23453	0.269296	0.889408	0.589784	0.119568	0.0371818	0.325509	0.0291615	0.558944	0.000133937	0.5147	0.344496	0.186071	0.0212395	0.56441	0.11509	0.77524	0.111813	0.0675147	0.769636	0.0186357	0.00183158	0.127271	0.183578	0.0417561		0.663052	0.0698388		0.00639419	0.222531	0.104917	0.121819
		N	25	25	25	25	25	25	25	25	25	25	25	25	25	25	25	25	25	25	25	25	25	25	25	25	25	25	25	25	25	25	25	25	25	25	25	25	25	25	25	25	25	25	25	25	25	25	25
	Yawn (c)	Correlation Coefficient	0.363329	-0.285389	0.187935	0.27112		-0.132993	0.182367	0.0701625	-0.11377	-0.0819929	-0.240997	0.104435	-0.235779	-0.143193	-0.0739928	0.0719036	0.222445	0.286343	0.204786	-0.136916	-0.25986	-0.0364849	-0.265901	-0.0766108	0.0144366	-0.071681	0.346479	0.334472	.420*	0.283248	-0.12038	.663**	-.631**	0.113247	0.367422	0.255093	.419*	0.0399372	0.0144366		-0.26736	0.13152		.435*	.639**	.444*	0.297958
		Sig. (2-tailed)	0.0742259	0.166711	0.368323	0.189887		0.526245	0.382934	0.738935	0.588169	0.696808	0.245846	0.619327	0.256532	0.494705	0.725209	0.732686	0.285185	0.165236	0.326115	0.514002	0.209673	0.86254	0.198891	0.715874	0.945395	0.733484	0.089749	0.102216	0.0368171	0.170055	0.566524	0.000307348	0.000715318	0.589897	0.0707846	0.218454	0.0369441	0.849671	0.945395		0.196346	0.53088		0.0298901	0.000590115	0.0263041	0.148005
		N	25	25	25	25	25	25	25	25	25	25	25	25	25	25	25	25	25	25	25	25	25	25	25	25	25	25	25	25	25	25	25	25	25	25	25	25	25	25	25	25	25	25	25	25	25	25	25
*. Correlation is significant at the 0.05 level (2-tailed).
**. Correlation is significant at the 0.01 level (2-tailed).
[truncated: 5 more columns]
